# Supplementary material for: Meta-analysis of the Age-Dependent Efficacy of Multiple Sclerosis Treatments
Source: Front Neurol. 2017 Nov 10;8:577. doi: 10.3389/fneur.2017.00577 (PMC5686062; doi:10.3389/fneur.2017.00577)
Supplement: Supplementary file 2 [file data_sheet_1.xlsx]

## Sheet: Sheet1
Index	Trial	Year	Experimental arm	Control arm	Drug efficacy: 1 = low, 2 = high	Type of MS: 1 = RRMS, 2 = SPMS, 3 = PPMS, 4 = RRMS and SPMS	Total trial sample size (intention to treat population)	n (Experimental group)	n (Control Group)	n (regression analysis)	Duration of trial (years)	Weight	Age at baseline (years)	EDSS at baseline	Minimum sustained progression (months)	%CDP in comparator group	%CDP in drug group	%IDP (trial specific)	Estimated %IDP of interferon-beta vs placebo at baseline age	%IDP (recalculated)	p	p: 0 > 0.05, 1 ≤ 0.05	References
A1	CAMMS223	2008	Alemtuzumab (12 mg IV daily)	Interferon beta-1a (Rebif), 44 µg SC 3 times/week	2	1	334	112	111	223	3	386.247	32.348	1.9	3	32.7	16.3	58	37.3458	73.6852	0.005	1	Camms Trial Investigators, Coles AJ, Compston DA, et al. Alemtuzumab vs. interferon beta-1a in early multiple sclerosis. N Engl J Med 2008;359:1786-1801.
A2	CARE-MS I	2012	Alemtuzumab (12 mg IV daily)	Interferon beta-1a (Rebif), 44 µg SC 3 times/week	2	1	581	376	187	563	2	796.202	33.0664	2	6	11.12	8	30	35.8869	55.1208	0.22	0	Cohen JA, Coles AJ, Arnold DL, et al. Alemtuzumab versus interferon beta 1a as first-line treatment for patients with relapsing-remitting multiple sclerosis: a randomised controlled phase 3 trial. Lancet 2012;380:1819-1828.
A3	CARE-MS II	2012	Alemtuzumab (12 mg IV daily)	Interferon beta-1a (Rebif), 44 µg SC 3 times/week	2	1	667	426	202	628	2	888.126	35.1217	2.7	6	21.13	12.71	42	31.7133	60.3937	0.0084	1	Coles AJ, Twyman CL, Arnold DL, et al. Alemtuzumab for patients with relapsing multiple sclerosis after disease-modifying therapy: a randomised controlled phase 3 trial. Lancet 2012;380:1829-1839.
D1	SELECT	2013	Daclizumab HYP (150 mg SC every 4 weeks)	Placebo	2	1	621	201	196	397	1	397	35.9437	2.75049	3	13	6	57	NA	57	0.021	1	Gold R, Giovannoni G, Selmaj K, et al. Daclizumab high-yield process in relapsing-remitting multiple sclerosis (SELECT): a randomised, double-blind, placebo-controlled trial. Lancet 2013;381:2167-2175.
D2	DECIDE	2015	Daclizumab HYP (150 mg SC every 4 weeks)	Interferon beta-1a (Avonex), 30 µg IM once weekly	2	1	1841	919	922	1841	2.76164	3059.41	36.2998	2.5	3	20	16	16	29.3208	40.6295	0.16	0	Kappos L, Wiendl H, Selmaj K, et al. Daclizumab HYP versus Interferon Beta-1a in Relapsing Multiple Sclerosis. N Engl J Med 2015;373:1418-1428.
DF1	CONFIRM	2012	Dimethyl fumarate (240 mg twice daily)	Placebo	1	1	1430	359	363	540.5	1.84109	733.388	37.4978	2.6	3	17	13	21	NA	21	0.25	0	Fox RJ, Miller DH, Phillips JT, et al. Placebo-controlled phase 3 study of oral BG-12 or glatiramer in multiple sclerosis. N Engl J Med 2012;367:1087-1097.
DF2	DEFINE	2012	Dimethyl fumarate (240 mg twice daily)	Placebo	1	1	1237	409	408	817	1.84109	1108.56	38.2995	2.4399	3	27	16	38	NA	38	0.005	1	Gold R, Kappos L, Arnold DL, et al. Placebo-controlled phase 3 study of oral BG-12 for relapsing multiple sclerosis. N Engl J Med 2012;367:1098-1107.
F1	FREEDOMS	2010	Fingolimod (0.5 mg daily)	Placebo	1	1	1272	425	418	843	2	1192.18	36.8975	2.39917	3	24.1	17.7	30	NA	30	0.02	1	Kappos L, Radue EW, O'Connor P, et al. A placebo-controlled trial of oral fingolimod in relapsing multiple sclerosis. N Engl J Med 2010;362:387-401.
F2	FREEDOMS II	2014	Fingolimod (0.5 mg daily)	Placebo	1	1	1083	358	355	713	1.97125	1001.06	40.3511	2.4	3	29	25.3	17	NA	17	0.227	0	Calabresi PA, Radue EW, Goodin D, et al. Safety and efficacy of fingolimod in patients with relapsing-remitting multiple sclerosis (FREEDOMS II): a double-blind, randomised, placebo-controlled, phase 3 trial. Lancet Neurol 2014;13:545-556.
F3	INFORMS	2016	Fingolimod (0.5 mg daily)	Placebo	1	3	970	336	487	823	4.31506	1709.6	48.5	4.67	3	49	46	11.99	NA	11.99	0.217	0	Lublin F, Miller DH, Freedman MS, et al. Oral fingolimod in primary progressive multiple sclerosis (INFORMS): a phase 3, randomised, double-blind, placebo-controlled trial. Lancet 2016;387:1075-1084.
F4	TRANSFORMS	2010	Fingolimod (0.5 mg daily)	Interferon beta-1a (Avonex), 30 µg IM once weekly	1	1	1292	429	431	860	1	860	36.3484	2.21488	3	7.9	5.9	25.3165	29.2222	47.1406	0.25	0	Cohen JA, Barkhof F, Comi G, et al. Oral fingolimod or intramuscular interferon for relapsing multiple sclerosis. N Engl J Med 2010;362:402-415.
G1	The Copolymer 1 Multiple Sclerosis Study Group	1995	Glatiramer acetate (20 mg SC, once daily)	Placebo	1	1	251	125	126	251	2	354.968	r	2.5992	3	24.6	21.6	12.1951	NA	12.1951	NS	0	Johnson KP, Brooks BR, Cohen JA, et al. Copolymer 1 reduces relapse rate and improves disability in relapsing-remitting multiple sclerosis: results of a phase III multicenter, double-blind placebo-controlled trial. The Copolymer 1 Multiple Sclerosis Study Group. Neurology 1995;45:1268-1276.
G2	PROMiSe	2007	Glatiramer acetate (20 mg SC, once daily)	Placebo	1	3	943	621	314	935	3	1619.47	50.4	4.9	3	Not indicated	Not indicated	13	NA	13	0.1753	0	Wolinsky JS, Narayana PA, O'Connor P, et al. Glatiramer acetate in primary progressive multiple sclerosis: results of a multinational, multicenter, double-blind, placebo-controlled trial. Ann Neurol 2007;61:14-24.
G3	REGARD	2008	Glatiramer acetate (20 mg SC, once daily)	Interferon beta-1a (Rebif), 44 µg SC three times per week	1	1	764	378	386	764	1.84109	1036.65	36.7495	2.3401	6	11.7	8.7	25.641	28.4077	46.7647	0.117	0	Mikol DD, Barkhof F, Chang P, et al. Comparison of subcutaneous interferon beta-1a with glatiramer acetate in patients with relapsing multiple sclerosis (the REbif vs Glatiramer Acetate in Relapsing MS Disease [REGARD] study): a multicentre, randomised, parallel, open-label trial. Lancet Neurol 2008;7:903-914.
G4	BEYOND	2009	Glatiramer acetate (20 mg SC, once daily)	Interferon beta-1b (Betaseron), 250 µg SC every other day	1	1	2244	455	888	1343	2	1899.29	35.6001	2.32668	3	21	20	4.7619	30.7416	34.0397	0.68	0	O'Connor P, Filippi M, Arnason B, et al. 250 microg or 500 microg interferon beta-1b versus 20 mg glatiramer acetate in relapsing-remitting multiple sclerosis: a prospective, randomised, multicentre study. Lancet Neurol 2009;8:889-897.
G5	CONFIRM	2012	Glatiramer acetate (20 mg SC, once daily)	Placebo	1	1	1417	350	363	531.5	1.84109	721.176	37.3418	2.6	3	17	16	7	NA	7	0.7	0	Fox RJ, Miller DH, Phillips JT, et al. Placebo-controlled phase 3 study of oral BG-12 or glatiramer in multiple sclerosis. N Engl J Med 2012;367:1087-1097.
G6	CombiRx	2013	Glatiramer acetate (20 mg SC, once daily)	Interferon beta-1a (Avonex), 30 µg IM once weekly	1	1	1008	246	241	487	3	843.509	38.3124	1.94912	3	21.5768	24.7967	-14.9234	25.2339	14.0763	Not Stated	NA	Lublin FD, Cofield SS, Cutter GR, et al. Randomized Study Combining Interferon & Glatiramer Acetate in Multiple Sclerosis. Annals of neurology 2013;73:327-340.
I1	MSCRG	1996	Interferon beta-1a (Avonex), 30 µg IM once weekly	Placebo	1	1	301	158	143	301	2	425.678	36.795	2.35249	6	34.9	21.9	37.2493	NA	37.2493	0.02	1	Jacobs LD, Cookfair DL, Rudick RA, et al. Intramuscular interferon beta-1a for disease progression in relapsing multiple sclerosis. The Multiple Sclerosis Collaborative Research Group (MSCRG). Ann Neurol 1996;39:285-294.
I2	Montalban et al.	2009	Interferon beta-1b (Betaseron), 250 µg SC every other day	Placebo	1	2, 4 (PPMS and transitional MS) - treat as solely progressive	73	36	37	73	2	103.238	48.6986	5.24932	3	43.2	34.2	20.8333	NA	20.8333	0.3135	0	Montalban X, Sastre-Garriga J, Tintore M, et al. A single-center, randomized, double-blind, placebo-controlled study of interferon beta-1b on primary progressive and transitional multiple sclerosis. Multiple sclerosis (Houndmills, Basingstoke, England) 2009;15:1195-1205.
I3	Leary SM et al.	2003	Interferon beta-1a (Avonex), 30 µg IM once weekly	Placebo	1	3	50	15	20	35	2	49.4975	44.5	5.25	3	45	54	-20	NA	-20	NS	0	Leary SM, Miller DH, Stevenson VL, Brex PA, Chard DT, Thompson AJ. Interferon beta-1a in primary progressive MS: an exploratory, randomized, controlled trial. Neurology 2003;60:44-51.
I4	PRISMS	1998	Interferon beta-1a (Rebif), 22 µg SC three times per week	Placebo	1	1	560	189	187	282.5	2	399.515	34.9	2.4669	3	41.1765	33.8624	17.7627	NA	17.7627	<0.05	1	PRISMS (Prevention of Relapses and Disability by Interferon beta-1a Subcutaneously in Multiple Sclerosis) Study Group. Randomised double-blind placebo-controlled study of interferon beta-1a in relapsing/remitting multiple sclerosis. Lancet 1998;352:1498-1504.
I5	PRISMS	1998	Interferon beta-1a (Rebif), 44 µg SC 3 times/week	Placebo	1	1	560	184	187	277.5	2	392.444	34.9	2.46631	3	41.1765	29.3478	28.7267	NA	28.7267	<0.05	1	PRISMS (Prevention of Relapses and Disability by Interferon beta-1a Subcutaneously in Multiple Sclerosis) Study Group. Randomised double-blind placebo-controlled study of interferon beta-1a in relapsing/remitting multiple sclerosis. Lancet 1998;352:1498-1504.
I6	SPECTRIMS	2001	Interferon beta-1a (Rebif), 22 µg SC 3 times/week	Placebo	1	2	618	172	173	258.5	3	447.735	42.9684	5.46709	3	Not indicated	Not indicated	12	NA	12	0.305	0	Secondary Progressive Efficacy Clinical Trial of Recombinant Interferon-Beta-1a in MS (SPECTRIMS) Study Group. Randomized controlled trial of interferon- beta-1a in secondary progressive MS: Clinical results. Neurology 2001;56:1496-1504.
I7	SPECTRIMS	2001	Interferon beta-1a (Rebif), 44 µg SC 3 times/week	Placebo	1	2	618	161	173	247.5	3	428.683	42.6334	5.33344	3	Not indicated	Not indicated	17	NA	17	0.146	0	Secondary Progressive Efficacy Clinical Trial of Recombinant Interferon-Beta-1a in MS (SPECTRIMS) Study Group. Randomized controlled trial of interferon- beta-1a in secondary progressive MS: Clinical results. Neurology 2001;56:1496-1504.
I8	INFB Multiple Sclerosis Study Group	1995	Interferon beta-1b (Betaseron), 250 µg SC every other day	Placebo	1	1	372	122	122	244	5	545.601	35.5	2.9	3	45.9016	35.2459	23.2143	NA	23.2143	0.096	0	The IFNB Multiple Sclerosis Study Group and The University of British Columbia MS/MRI Analysis Group. Interferon beta-1b in the treatment of multiple sclerosis: final outcome of the randomized controlled trial. Neurology 1995;45:1277-1285.
I9	EUSPMS	1998	Interferon beta-1b (Betaseron), 250 µg SC every other day	Placebo	1	2	718	360	358	718	2.75	1190.67	41.0003	5.14986	3	49.7	38.9	21.7304	NA	21.7304	0.0048	1	European Study Group on interferon beta-1b in secondary progressive MS. Placebo-controlled multicentre randomised trial of interferon beta-1b in treatment of secondary progressive multiple sclerosis. Lancet 1998;352:1491-1497.
I10	NASPMS	2004	Interferon beta-1b (Betaseron), 250 µg SC every other day	Placebo	1	2	939	317	308	625	3	1082.53	46.8	5.15072	6	34.4156	32.4921	5.58895	NA	5.58895	0.59	0	Panitch H, Miller A, Paty D, Weinshenker B, North American Study Group on Interferon beta-1b in Secondary Progressive MS. Interferon beta-1b in secondary progressive MS: results from a 3-year controlled study. Neurology 2004;63:1788-1795.
I11	ADVANCE	2014	Pegylated interferon beta-1a (Plegridy), 125 µg SC once every 2 weeks	Placebo	1	1	1512	512	500	1012	0.920547	970.965	36.6036	2.45518	3	10.5	6.8	38	NA	38	0.0383	1	Calabresi PA, Kieseier BC, Arnold DL, et al. Pegylated interferon beta-1a for relapsing-remitting multiple sclerosis (ADVANCE): a randomised, phase 3, double-blind study. Lancet Neurol 2014;13:657-665.
I12	BRAVO	2014	Interferon beta-1a (Avonex), 30 µg IM once weekly	Placebo	1	1	1331	447	450	672	2	950.352	38	2.5	3	13.3333	10.5145	26	NA	26	0.13	0	Vollmer TL, Sorensen PS, Selmaj K, et al. A randomized placebo-controlled phase III trial of oral laquinimod for multiple sclerosis. Journal of Neurology 2014;261:773-783.
L1	ALLEGRO	2012	Laquinimod (0.6 mg once daily)	Placebo	NA	1	1106	550	556	1106	2	1564.12	38.6989	2.6	3	15.7	11.1	36	NA	36	0.01	1	Comi G, Jeffery D, Kappos L, et al. Placebo-Controlled Trial of Oral Laquinimod for Multiple Sclerosis. New England Journal of Medicine 2012;366:1000-1009.
L2	BRAVO	2014	Laquinimod (0.6 mg once daily)	Placebo	NA	1	1331	434	450	659	2	931.967	37.1	2.5	3	13.3333	9.67742	31	NA	31	0.063	0	Vollmer TL, Sorensen PS, Selmaj K, et al. A randomized placebo-controlled phase III trial of oral laquinimod for multiple sclerosis. Journal of Neurology 2014;261:773-783.
M1	MIMS	2002	Mitoxantrone (12 mg/m2 every 3 months)	Placebo	2	4 (45% worsening RRMS/55% SPMS in placebo versus 47% worsening RRMS/53% SPMS in drug) -treat as both	194	60	64	124	2	175.362	39.9813	4.57387	3	22	8	63.6364	NA	63.64	0.036	1	Hartung HP, Gonsette R, Konig N, et al. Mitoxantrone in progressive multiple sclerosis: a placebo-controlled, double-blind, randomised, multicentre trial. Lancet 2002;360:2018-2025.
N1	AFFIRM	2006	Natalizumab (300 mg IV every 4 weeks)	Placebo	2	1	942	627	315	942	2.30137	1429.04	36	2.3	6	Not indicated	Not indicated	54	NA	54	<0.001	1	Polman CH, O'Connor PW, Havrdova E, et al. A randomized, placebo-controlled trial of natalizumab for relapsing multiple sclerosis. N Engl J Med 2006;354:899-910.
N2	SENTINEL	2006	Natalizumab (300 mg IV every 4 weeks) + IFN-beta-1a (Avonex)	IFN-beta-1a (Avonex) + Placebo	2	1	1171	589	582	1171	2.30137	1776.44	38.9	2.4	3	29	23	24	NA	24	0.02	1	Rudick RA, Stuart WH, Calabresi PA, et al. Natalizumab plus Interferon Beta-1a for Relapsing Multiple Sclerosis. New England Journal of Medicine 2006;354:911-923.
N3	ASCEND	2016*	Natalizumab (300 mg IV every 4 weeks)	Placebo	2	2	887	439	448	887	1.84109	1203.54	47.2	5.2	6	15	16	-6.66667	NA	-6.66667	0.753	0	Steiner D, Arnold DL, Freedman MS, et al. Natalizumab Versus Placebo in Patients with Secondary Progressive Multiple Sclerosis (SPMS): Results from ASCEND, a Multicenter, Double-blind, Placebo-Controlled, Randomized Phase 3 Clinical Trial. 68th Annual Meeting of the American Academy of Neurology; 2016; Vancouver, Canada.
O1	OPERA I	2016	Ocrelizumab (600 mg IV every 24 weeks)	Interferon beta-1a (Rebif), 44 µg SC 3 times/week	2	1	821	NA	NA	821	1.84109	1113.99	36.9999	2.80493	3	12.2	7.6	43	27.8992	58.9025	0.01	1	Hauser SL, Bar-Or A, Comi G, et al. Ocrelizumab versus Interferon Beta-1a in Relapsing Multiple Sclerosis. N Engl J Med 2016.
O2	OPERA II	2016	Ocrelizumab (600 mg IV every 24 weeks)	Interferon beta-1a (Rebif), 44 µg SC 3 times/week	2	1	835	NA	NA	835	1.84109	1132.99	37.3001	2.81004	3	15.1	10.6	37	27.2895	54.1924	0.02	1	Hauser SL, Bar-Or A, Comi G, et al. Ocrelizumab versus Interferon Beta-1a in Relapsing Multiple Sclerosis. N Engl J Med 2016.
O3	ORATORIO	2016	Ocrelizumab (600 mg IV every 24 weeks)	Placebo	2	3	732	487	244	731	2.85	1234.07	44.6	4.7	6	35.7	29.6	25	NA	25	0.04	1	Montalban X, Hauser SL, Kappos L, et al. Ocrelizumab versus Placebo in Primary Progressive Multiple Sclerosis. N Engl J Med 2016.
R1	OLYMPUS	2009	Rituximab (1000 mg x 2 doses, every 24 weeks)	Placebo	NA	3	439	292	147	439	1.84109	595.666	49.9	4.8	3	38.5	30.2	23	NA	23	0.1442	0	Hawker K, O'Connor P, Freedman MS, et al. Rituximab in patients with primary progressive multiple sclerosis: results of a randomized double-blind placebo-controlled multicenter trial. Ann Neurol 2009;66:460-471.
S1	EXPAND	2016*	Siponimod (2 mg daily)	Placebo	NA	2	1651	NA	NA	1363	1.75	1803.08	48	5.4	3	Not indicated	Not indicated	21	NA	21	0.013	1	Kappos L, Bar-Or A, Cree B, et al. Efficacy and safety of siponimod in secondary progressive multiple sclerosis - Results of the placebo controlled, double-blind, Phase III EXPAND study. ECTRIMS; 2016; London, UK: ECTRIMS Online Library.
T1	TEMSO	2011	Teriflunomide (7mg daily)	Placebo	1	4 (small percentage of patients with SPMS, so treat as RRMS)	1088	365	363	546.5	2.07123	786.51	37.7315	2.68	3	27.3	21.7	23.7	NA	23.7	0.08	0	O'Connor P, Wolinsky JS, Confavreux C, et al. Randomized trial of oral teriflunomide for relapsing multiple sclerosis. N Engl J Med 2011;365:1293-1303.
T2	TEMSO	2011	Teriflunomide (14 mg daily)	Placebo	1	4 (small percentage of patients with SPMS, so treat as RRMS)	1088	358	363	539.5	2.07123	776.436	38.0015	2.67336	3	27.3	20.2	29.8	NA	29.8	0.03	1	O'Connor P, Wolinsky JS, Confavreux C, et al. Randomized trial of oral teriflunomide for relapsing multiple sclerosis. N Engl J Med 2011;365:1293-1303.
T3	TOWER	2014	Teriflunomide (7 mg daily)	Placebo	1	4 (small percentage of patients with SPMS, so treat as RRMS)	1169	407	388	601	1.54434	746.872	37.626	2.70354	3	21	22.2	5	NA	5	0.762	0	Confavreux C, O'Connor P, Comi G, et al. Oral teriflunomide for patients with relapsing multiple sclerosis (TOWER): a randomised, double-blind, placebo-controlled, phase 3 trial. Lancet Neurol 2014;13:247-256.
T4	TOWER	2014	Teriflunomide (14 mg daily)	Placebo	1	4 (small percentage of patients with SPMS, so treat as RRMS)	1169	370	388	564	1.60328	714.14	38.1657	2.70313	3	21	15.8	32	NA	32	0.0442	1	Confavreux C, O'Connor P, Comi G, et al. Oral teriflunomide for patients with relapsing multiple sclerosis (TOWER): a randomised, double-blind, placebo-controlled, phase 3 trial. Lancet Neurol 2014;13:247-256.
